# Supplementary material
Source: PubMed Central journal article supplement (PMC5119011)
Supplement: AAC.01289-16_zac012165753so1.pdf [file AAC.01289-16_zac012165753so1.pdf]

**Table S1. Culture media and incubation environments.**

| <b>Media<sup>a</sup></b>                                             | <b>Incubation Conditions</b> | <b>Incubation Interval</b>                                                                   | <b>Volume Plated</b> |
|----------------------------------------------------------------------|------------------------------|----------------------------------------------------------------------------------------------|----------------------|
| Trypticase soy agar with 5% sheep blood                              | 35 °C, 5% CO <sub>2</sub>    | Three days (first read after 24 hours)                                                       | 10 uL and 100 uL     |
| Chocolate agar                                                       | 35 °C, 5% CO <sub>2</sub>    | Three days (first read after 24 hours)                                                       | 50 uL                |
| Colistin naladixic acid agar                                         | 35 °C, 5% CO <sub>2</sub>    | Three days (first read after 24 hours)                                                       | 50 uL                |
| MacConkey agar                                                       | 35 °C, O <sub>2</sub>        | Three days                                                                                   | 50 uL                |
| Chopped meat broth enrichment                                        | 35 °C, Anaerobic jar         | Incubate for 24 hours, then subculture to BBA, BBE, LKV                                      | 50 uL                |
| <i>Brucella</i> blood agar with hemin and vitamin K (BBA)            | 35 °C, Anaerobic jar         | Seven days (first read after 48 hours)                                                       | 100 uL and 10 uL     |
| <i>Bacteroides</i> bile esculin (BBE)                                | 35 °C, Anaerobic jar         | Seven days (first read after 48 hours)                                                       | 50 uL                |
| <i>Brucella</i> laked blood agar with kanamycin and vancomycin (LKV) | 35 °C, Anaerobic jar         | Seven days (first read after 48 hours)                                                       | 50 uL                |
| Sabbaroud's agar with chloramphenicol                                | 25 °C, O <sub>2</sub>        | Three weeks (first read after 48 hours, plates sealed after 48 hours to prevent dehydration) | 50 uL                |

<sup>a</sup> All medium from Hardy Diagnostics

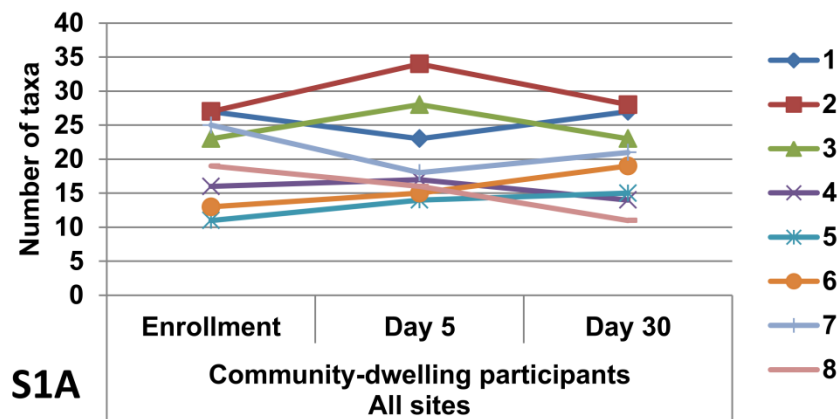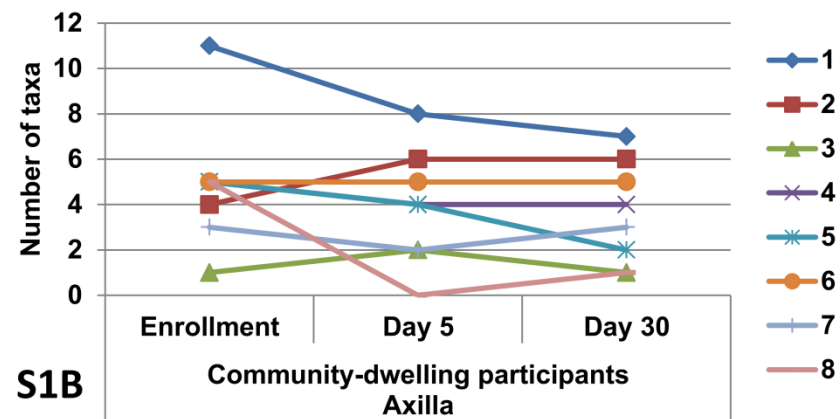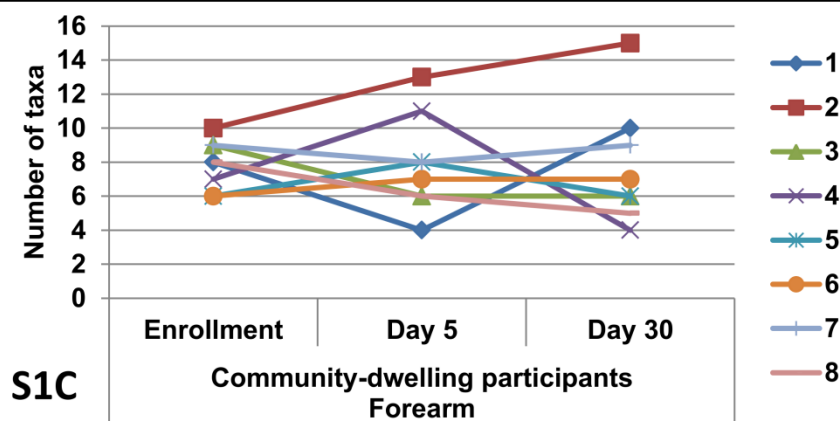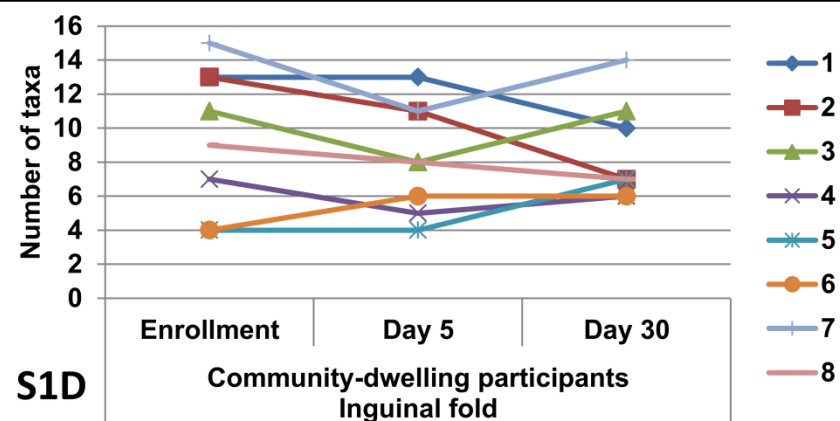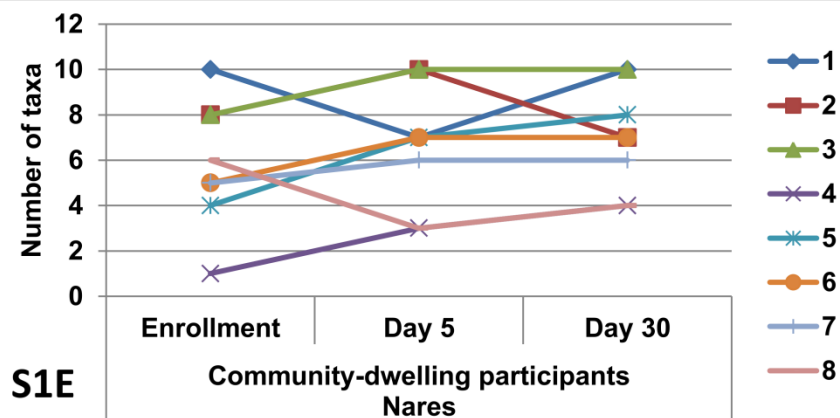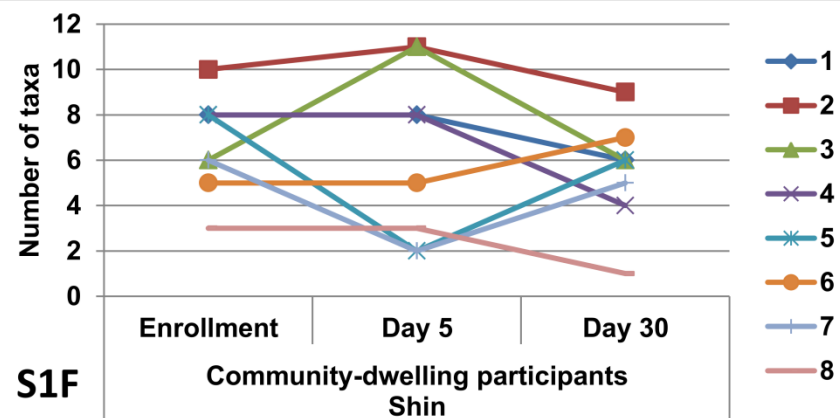

**Figure S1.** Richness of each community-dwelling participant at each time point. Each line represents a distinct participant. **A.** All sites combined. **B.** Axilla. **C.** Forearm. **D.** Inguinal fold. **E.** Nares. **F.** Shin.

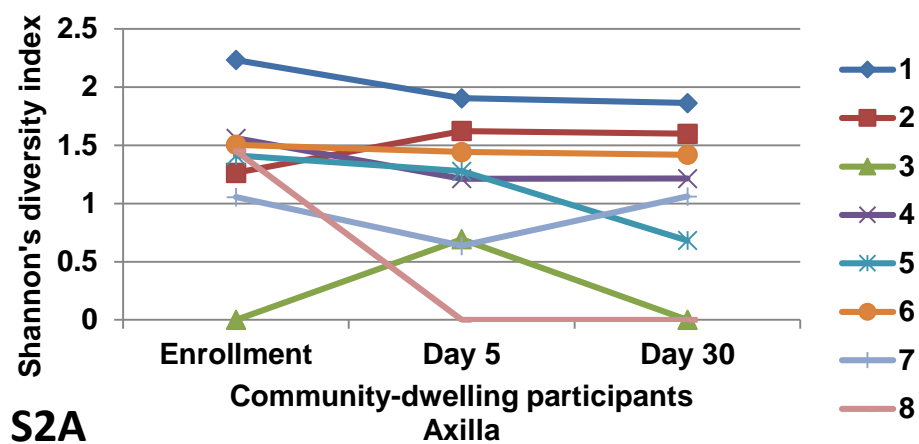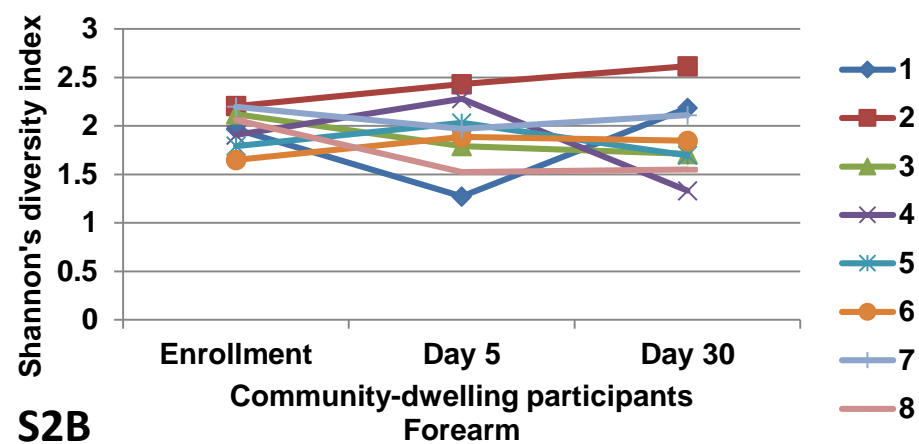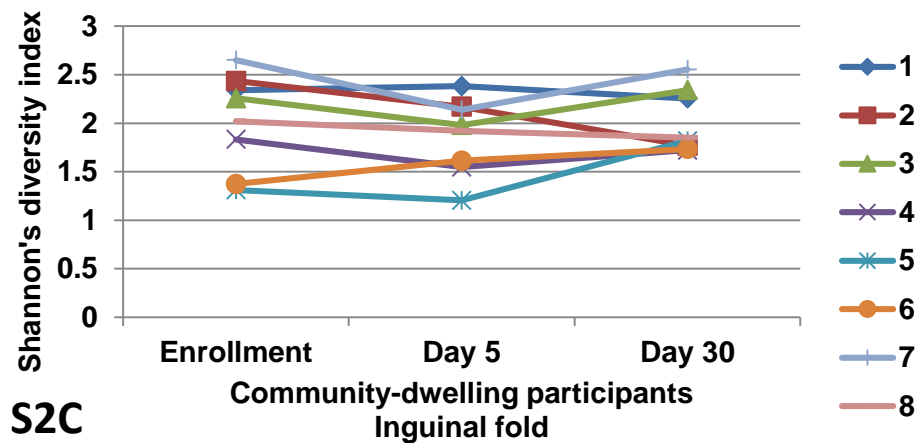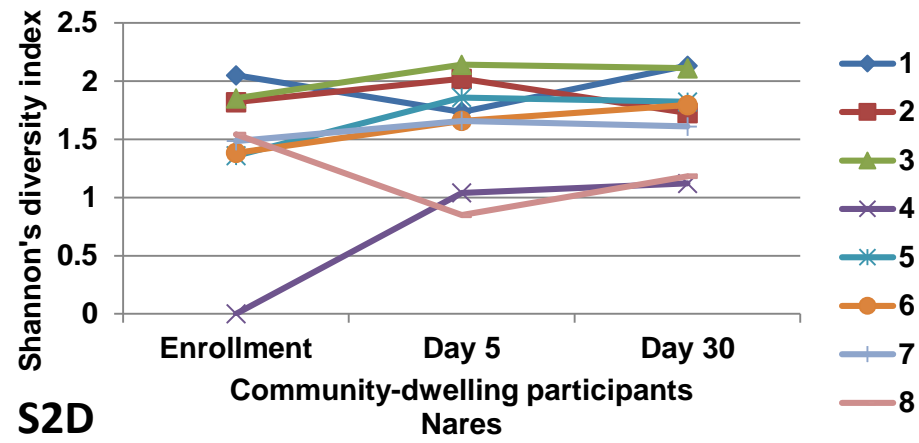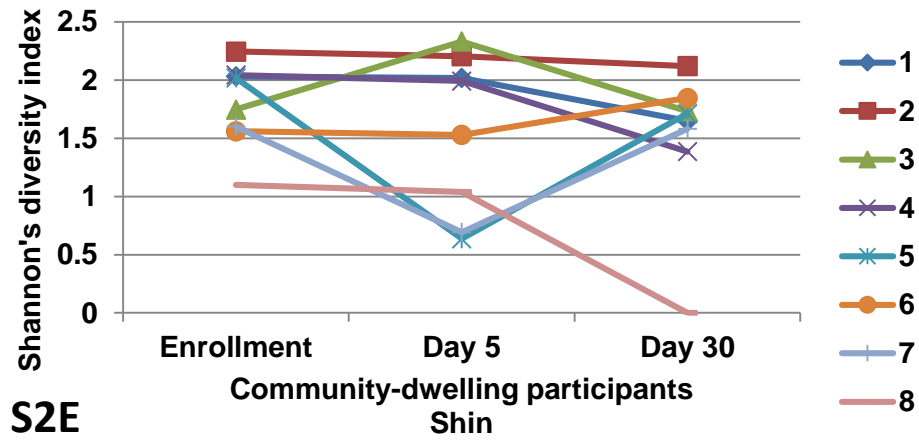

**Figure S2.** Diversity of each community-dwelling participant at each time point. Each line represents a distinct participant. **A.** Axilla. **B.** Forearm. **C.** Inguinal fold. **D.** Nares. **E.** Shin.

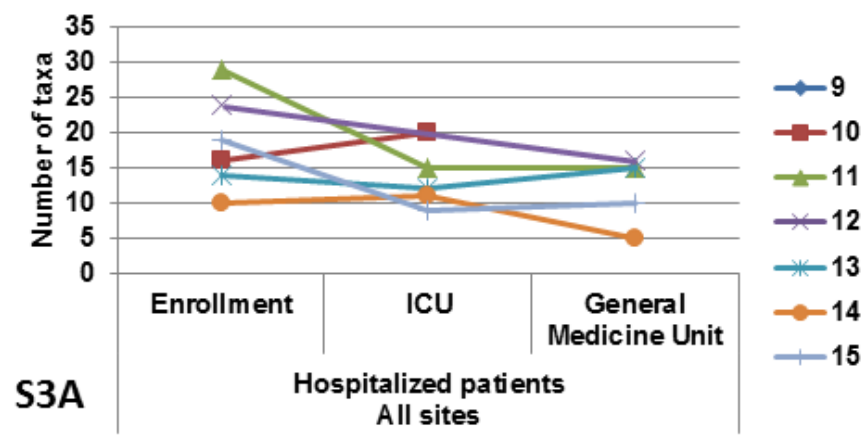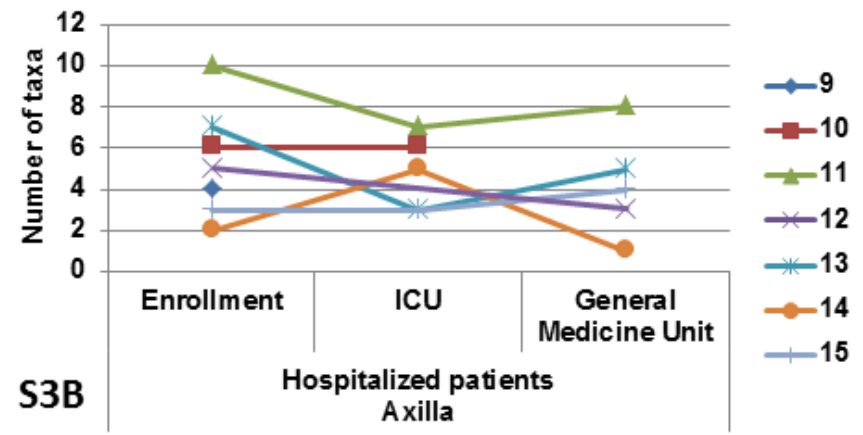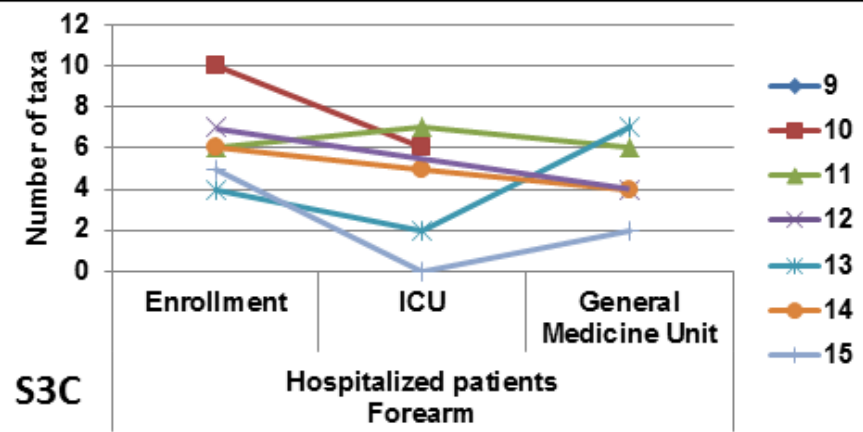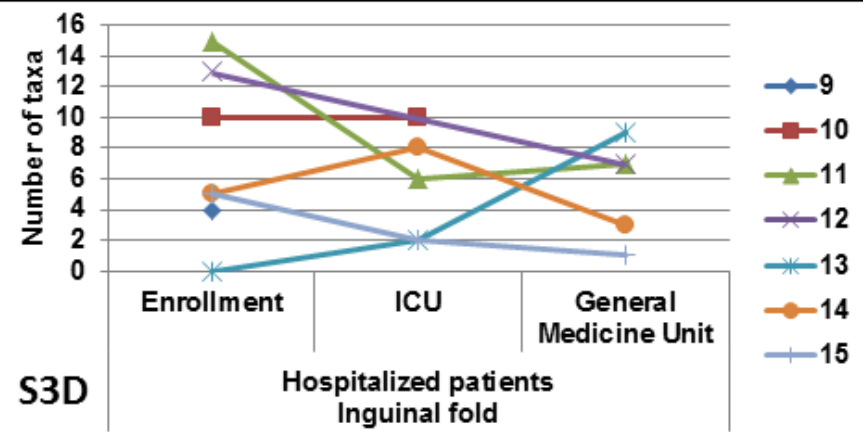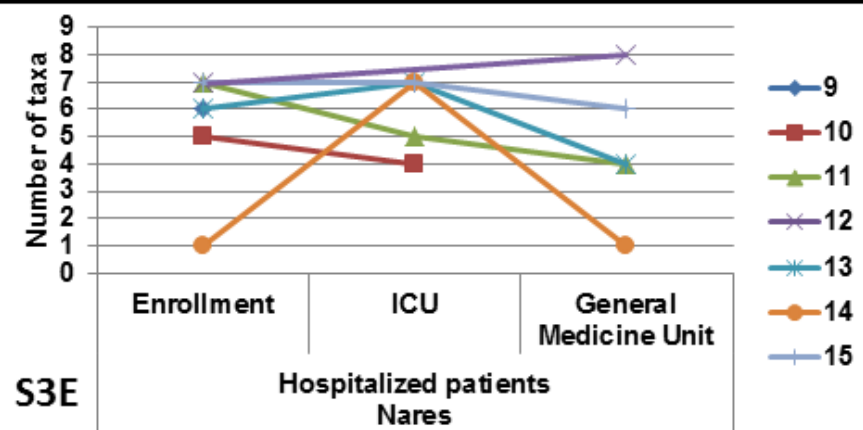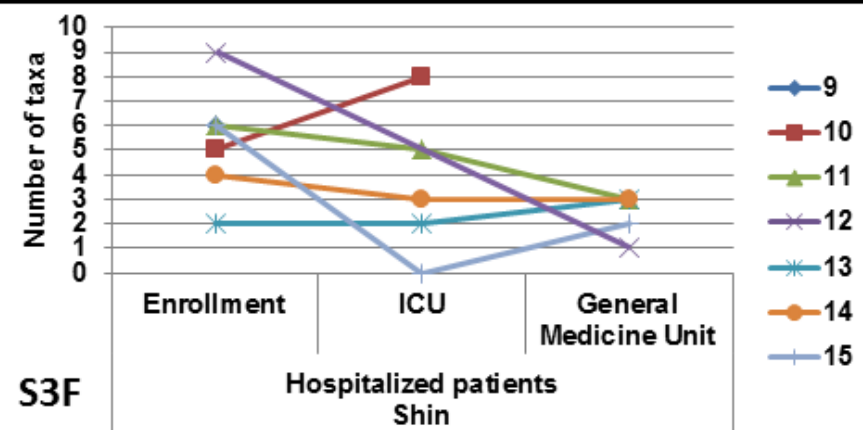

**Figure S3.** Richness of each hospitalized patient at each time point. Each line represents a distinct patient. **A.** All sites combined. **B.** Axilla. **C.** Forearm. **D.** Inguinal fold. **E.** Nares. **F.** Shin.

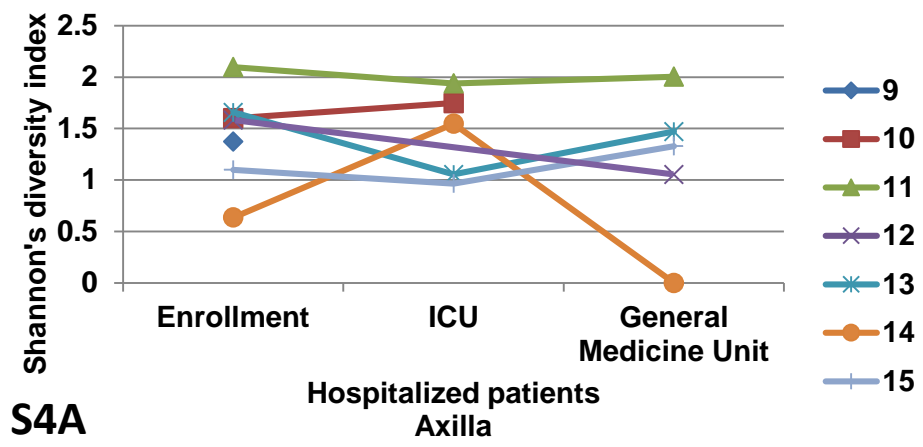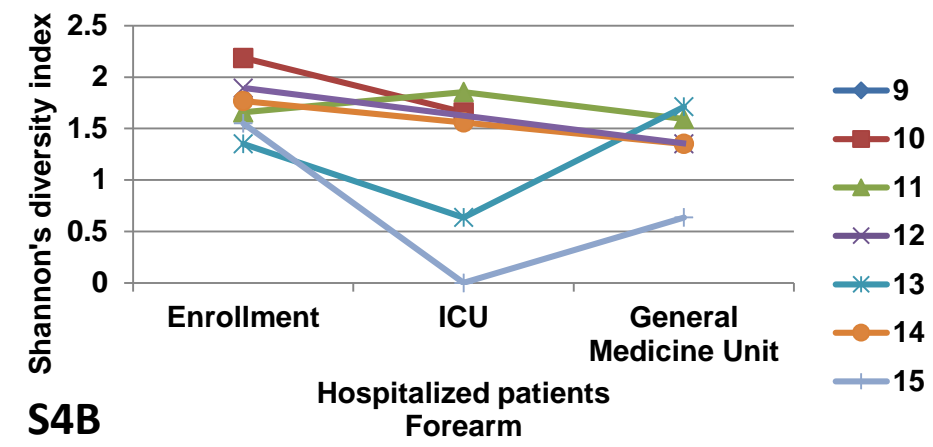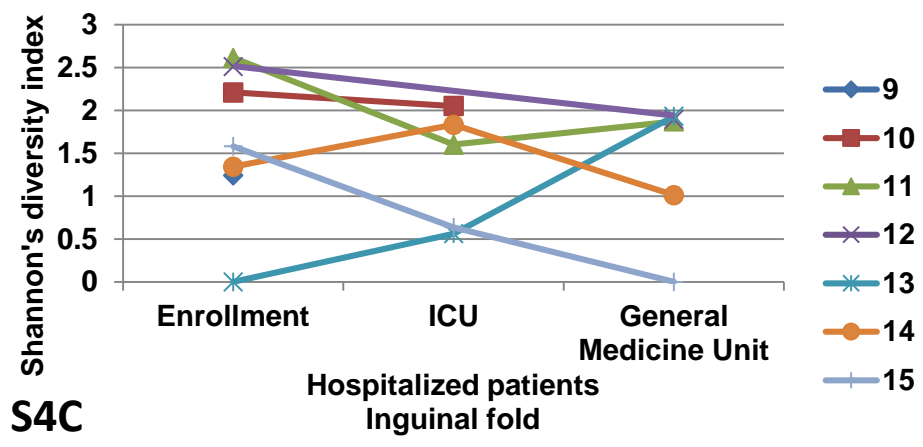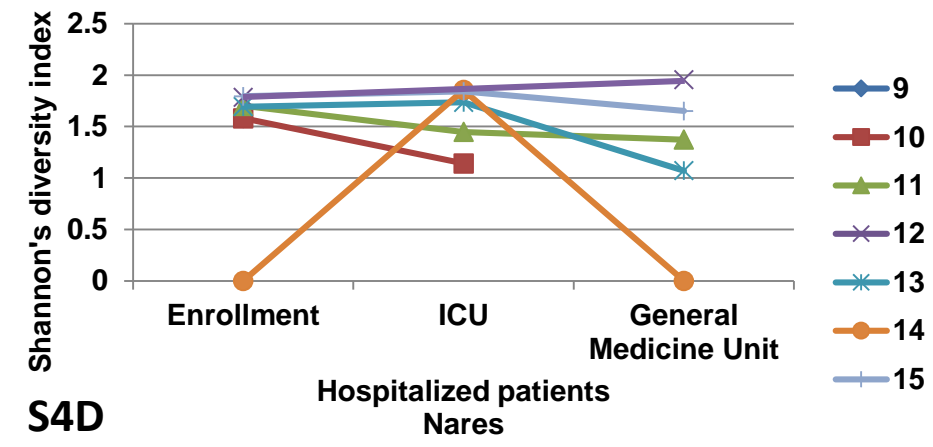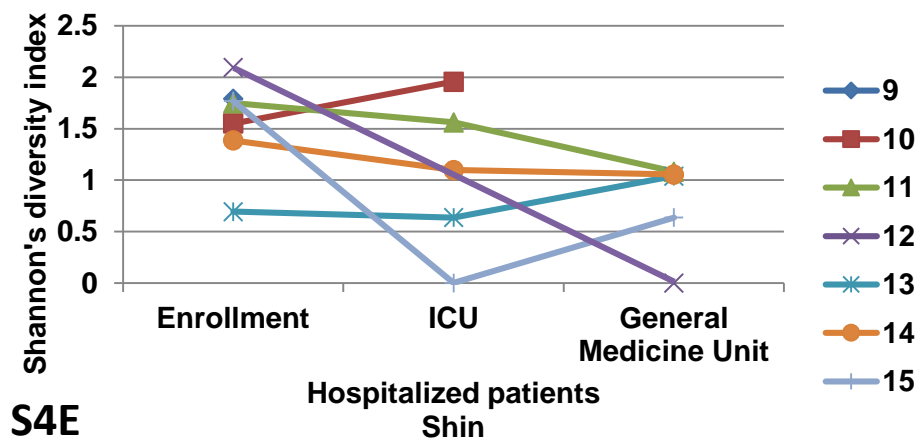

**Figure S4.** Diversity of each hospitalized patient at each time point. Each line represents a distinct patient. **A.** Axilla. **B.** Forearm. **C.** Inguinal fold. **D.** Nares. **E.** Shin.
